# Supplementary material for: Growth Differentiation Factor 15 May Predict Mortality of Peripheral and Coronary Artery Diseases and Correlate with Their Risk Factors
Source: Hindawi journal article supplement (doi:10.1155/2017/9398401), 2017-01-01
Supplement: f1 [file 9398401.f1.pdf]

Supplementary Table 1. Seven single nucleotide polymorphisms (SNPs) near and at the *GDF15* in this study

| Gene   | SNP<br>number | Position | Location    | Minor<br>allele | MAF   | HWE   | Function | Primer sequence              |
|--------|---------------|----------|-------------|-----------------|-------|-------|----------|------------------------------|
| PGPEP1 | rs749451      | 18479647 | 3'-UTR      | C               | 0.482 | 0.942 |          | TaqMan SNP Genotyping Assays |
| PGPEP1 | rs888663      | 18484922 |             | G               | 0.167 | 0.979 |          | TaqMan SNP Genotyping Assays |
| GDF15  | rs8101804     | 18496107 | nearGene-5  | T               | 0.318 | 0.672 |          | TaqMan SNP Genotyping Assays |
|        |               |          | (-862)      |                 |       |       |          |                              |
| GDF15  | rs1227731     | 18497903 | intron      | A               | 0.164 | 0.719 |          | TaqMan SNP Genotyping Assays |
| GDF15  | rs1058587     | 18499422 | Exon2       | G               | 0.281 | 0.912 | Missense | TaqMan SNP Genotyping Assays |
|        |               |          |             |                 |       |       | (H→D)    |                              |
| GDF15  | rs1054564     | 18499815 | 3'-UTR      | C               | 0.164 | 0.736 | MiRNASNP | TaqMan SNP Genotyping Assays |
| GDF15  | rs16982345    | 18500722 | nearGene-3' | A               | 0.28  | 0.967 |          | TaqMan SNP Genotyping Assays |

MAF : minor allele frequency ; HWE : Hardy-Weinberg equilibrium

Supplementary Figure 1. Linkage disequilibrium (LD) observed across SNPs of GDF15. The color scale in each square indicates the level of LD between the SNP pair.

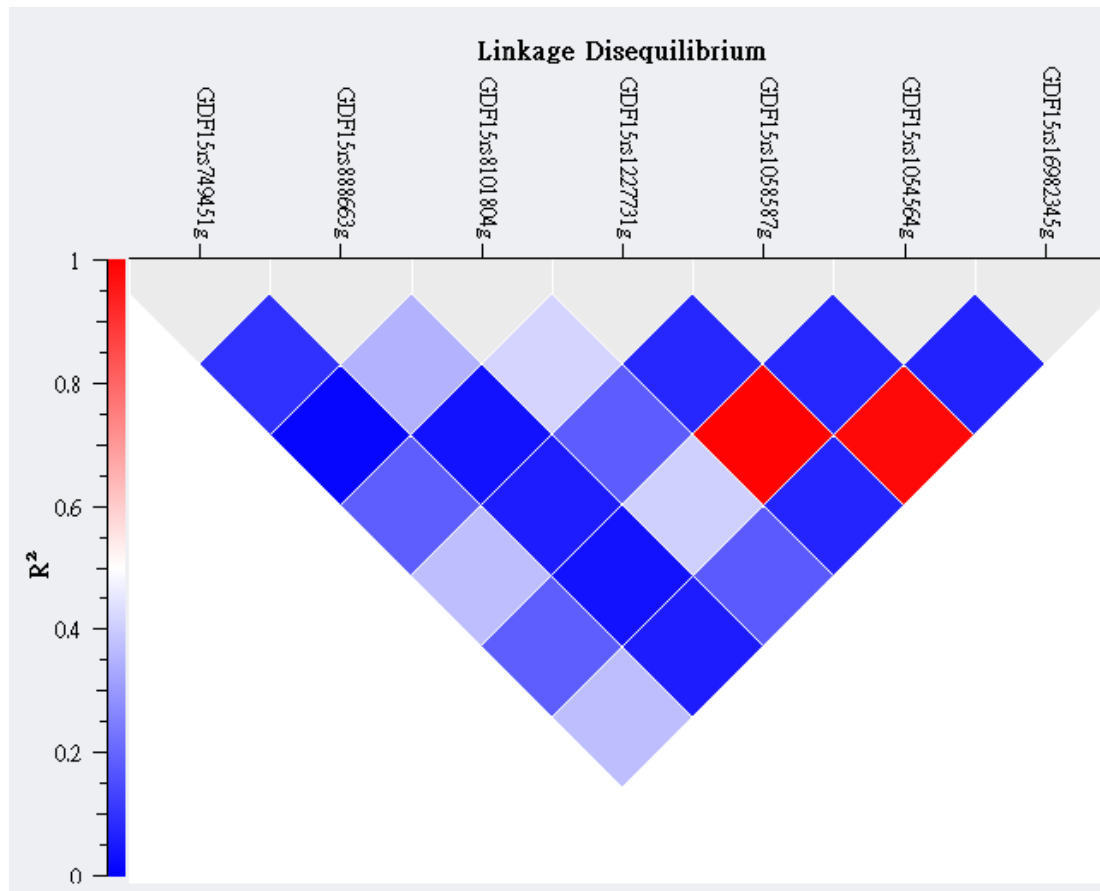

### **Supplementary References:**

1. Chang PY, Wu TL, Tsao KC, et al. Microplate ELISAs for soluble VCAM-1 and ICAM-1. *Ann Clin Lab Sci* 2005; 35:312-7.
2. Tsao KC, Chang PY, Li CC, Wu TL, Sun CF, Wu JT. Development of a microplate ELISA for circulating E-selectin: assay characterization, comparison with a commercial kit, and establishment of normal reference values. *J Clin Lab Anal* 2003; 17:97-101.
3. Wu TL, I Chen Tsai, Chang PY, et al. Establishment of an in-house ELISA and the reference range for serum amyloid A (SAA): complementarity between SAA and C-reactive protein as markers of inflammation. *Clin Chim Acta* 2007; 376:72-6.
4. Wu TL, Tsao KC, Chang CP, Li CN, Sun CF, Wu JT. Development of ELISA on microplate for serum C-reactive protein and establishment of age-dependent normal reference range. *Clin Chim Acta* 2002; 322:163-8.
5. Wu TL, Chang PY, Li CC, et al. Microplate ELISA for urine microalbumin: reference values and results in patients with type2 diabetes and cardiovascular disease. *Ann Clin Lab Sci* 2005; 35:149-54.
6. Chiou CC, Chang PY, Chan EC, et al. Urinary 8-hydroxydeoxyguanosine and its analogs as DNA marker of oxidative stress: development of an ELISA and measurement in both bladder and prostate cancers. *Clin Chim Acta* 2003; 334:87-94.
